# Supplementary material
Source: publisher figshare collection journal article supplement (https://springernature.figshare.com/ndownloader/files/21687585)

## Additional file 2 - PRISMA Flow Diagram

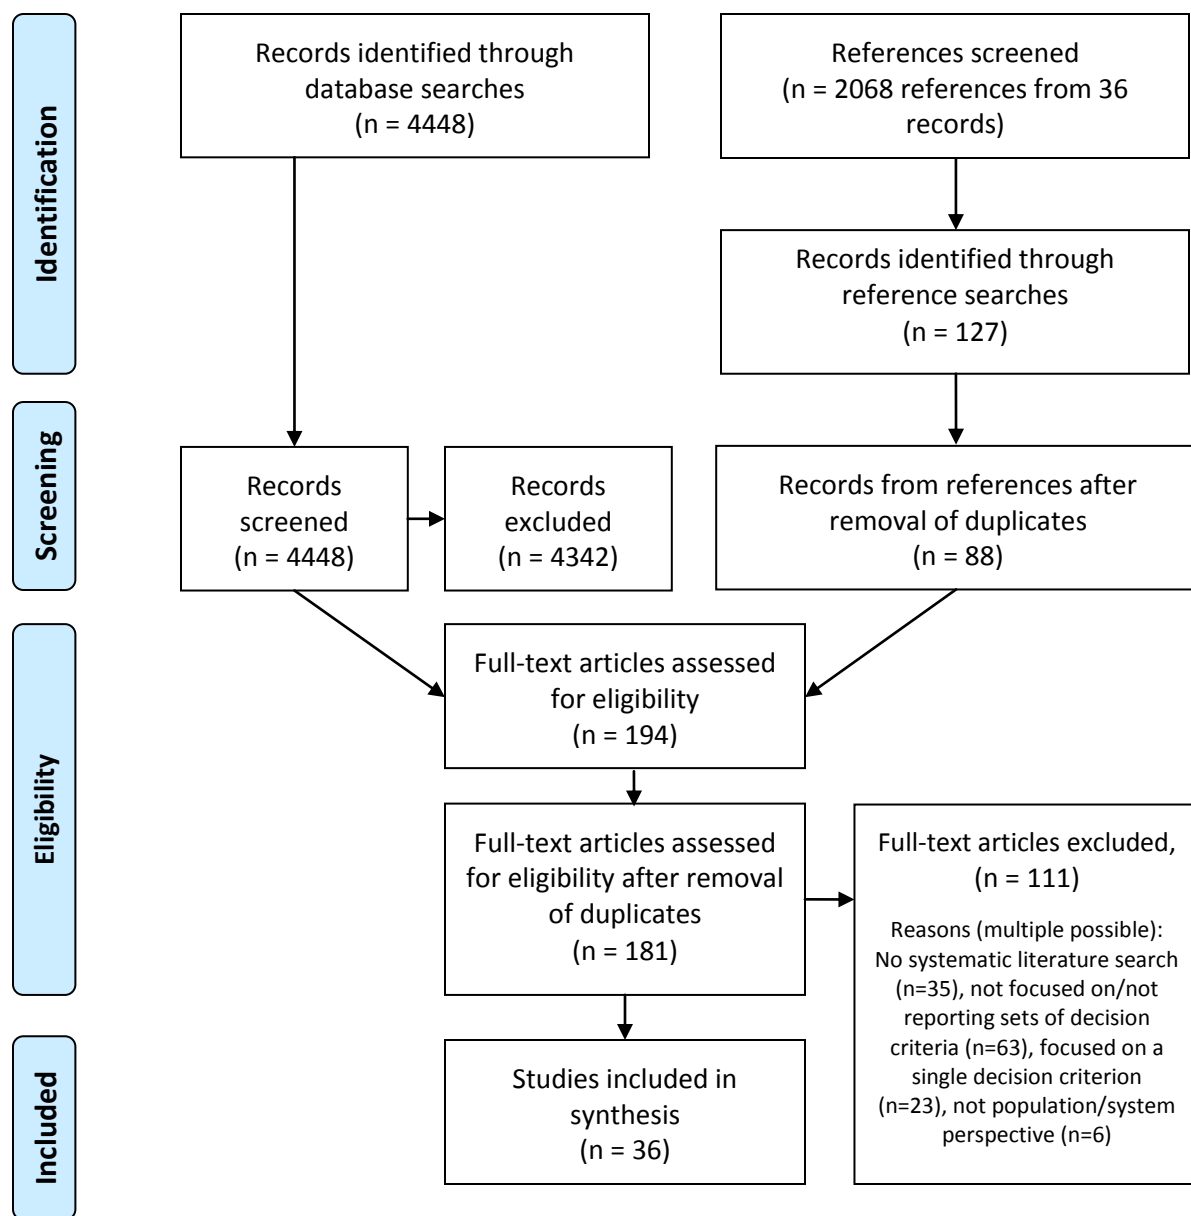

Supplement: Supplementary file [file 21687585]
